# Supplementary material for: Luminescence and upconversion from thulium(iii) species in solution
Source: Royal Society of Chemistry journal article supplement (doi:10.1039/c2cp42228j), 2012-01-01
Supplement: c2cp42228j.pdf [file c2cp42228j.pdf]

## Supporting Information

# Luminescence and Upconversion from Thulium (III) Species in Solution

*Octavia A. Blackburn,<sup>a</sup> Manuel Tropiano,<sup>a</sup> Thomas Just Sørensen,<sup>a,b,\*</sup> James Thom,<sup>a</sup>  
Andrew Beeby,<sup>c,\*</sup> Lisa M. Bushby,<sup>c</sup> David Parker,<sup>c</sup> Louise S. Natrajan<sup>d</sup> and Stephen  
Faulkner<sup>a,\*</sup>*

a) Chemistry Research Laboratory, University of Oxford, Mansfield Road, Oxford,  
OX1 3TA, UK; Fax:+44 1865285148; Tel:+44 1865285005; E-mail:

Stephen.Faulkner@chem.ox.ac.uk

b) Nano-Science Center & Department of Chemistry, University of Copenhagen,  
Universitetsparken 5, DK-2100 København Ø, Denmark. Fax:+45 35320214; Tel:+45  
35320213; E-mail: TJS@chem.ku.dk

c) Department of Chemistry, University of Durham, South Road, Durham, DH1 3LE,  
UK. Fax:+44 191 334 2051; Tel:+44 191 334 2023; E-mail:

Andrew.Beeby@chem.ox.ac.uk

d) School of Chemistry, University of Manchester, Oxford Road, Manchester, M13  
9PL, UK.

## Contents

|                                                                         |    |
|-------------------------------------------------------------------------|----|
| Contents.....                                                           | 2  |
| 1. Structures of complexes .....                                        | 2  |
| 2. Absorption Spectra.....                                              | 3  |
| 3. Time-Correlated Single Photon Counting (TCSPC) traces and fits ..... | 4  |
| 4. Emission Spectra .....                                               | 11 |

## 1. Structures of complexes

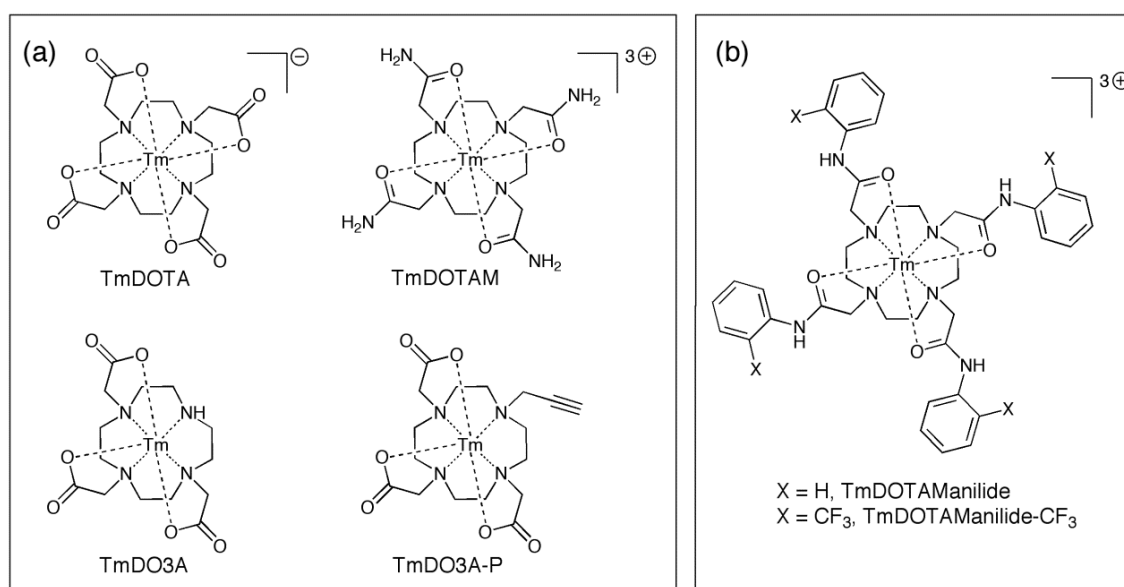

## 2. Absorption Spectra

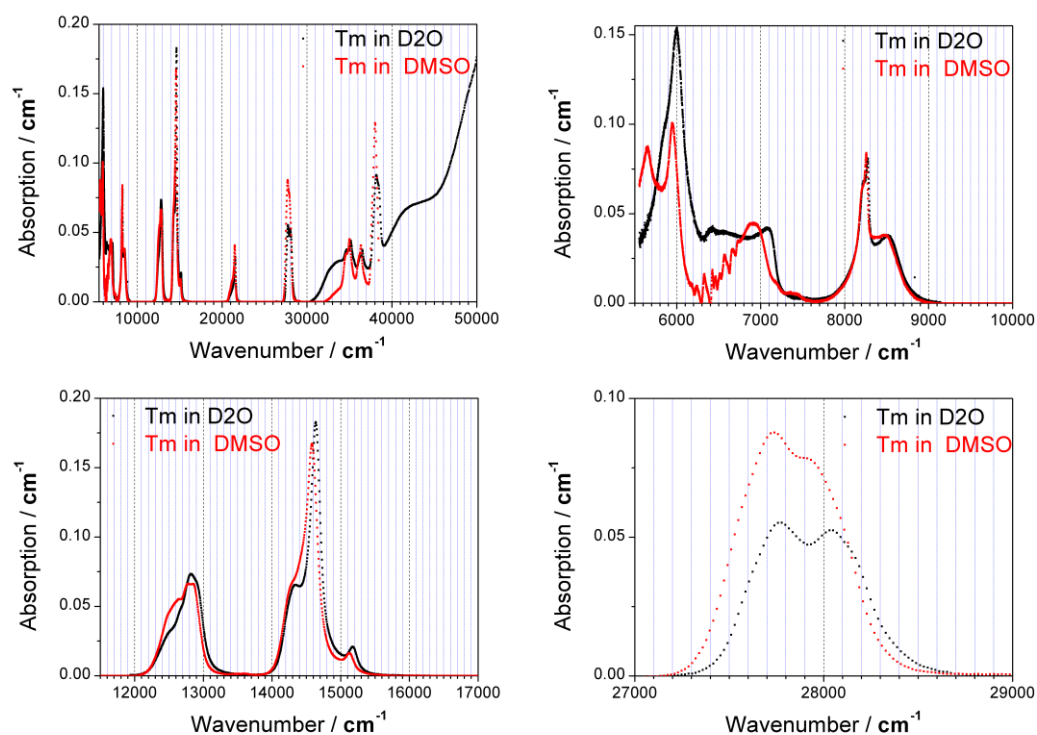

Figure S1. Absorption spectra of thulium trifluoromethanesulfonate ( $\text{Tm}(\text{OTf})_3$ ) (in  $\text{D}_2\text{O}$  (black) and  $\text{d}_6\text{-DMSO}$  (red)) showing the full spectrum (top left) and expanded regions. The feature at ca. 7000  $\text{cm}^{-1}$  is associated with trifluoromethanesulfonate.

### 3. Time-Correlated Single Photon Counting (TCSPC) traces and fits

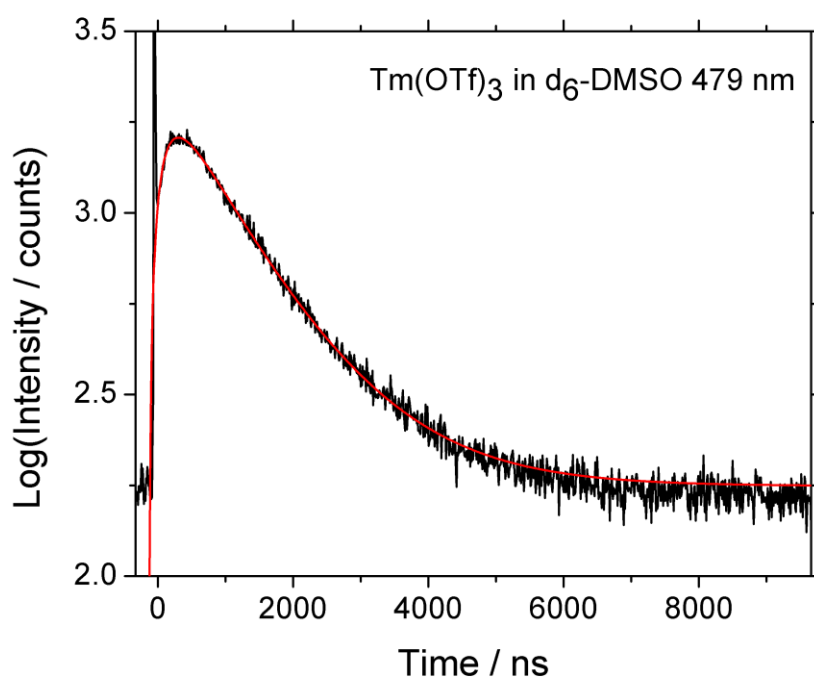

Figure S2. TCSPC trace of Tm(OTf)<sub>3</sub> in d<sub>6</sub>-DMSO recorded at 479 nm with 364 nm excitation showing negative time delays.

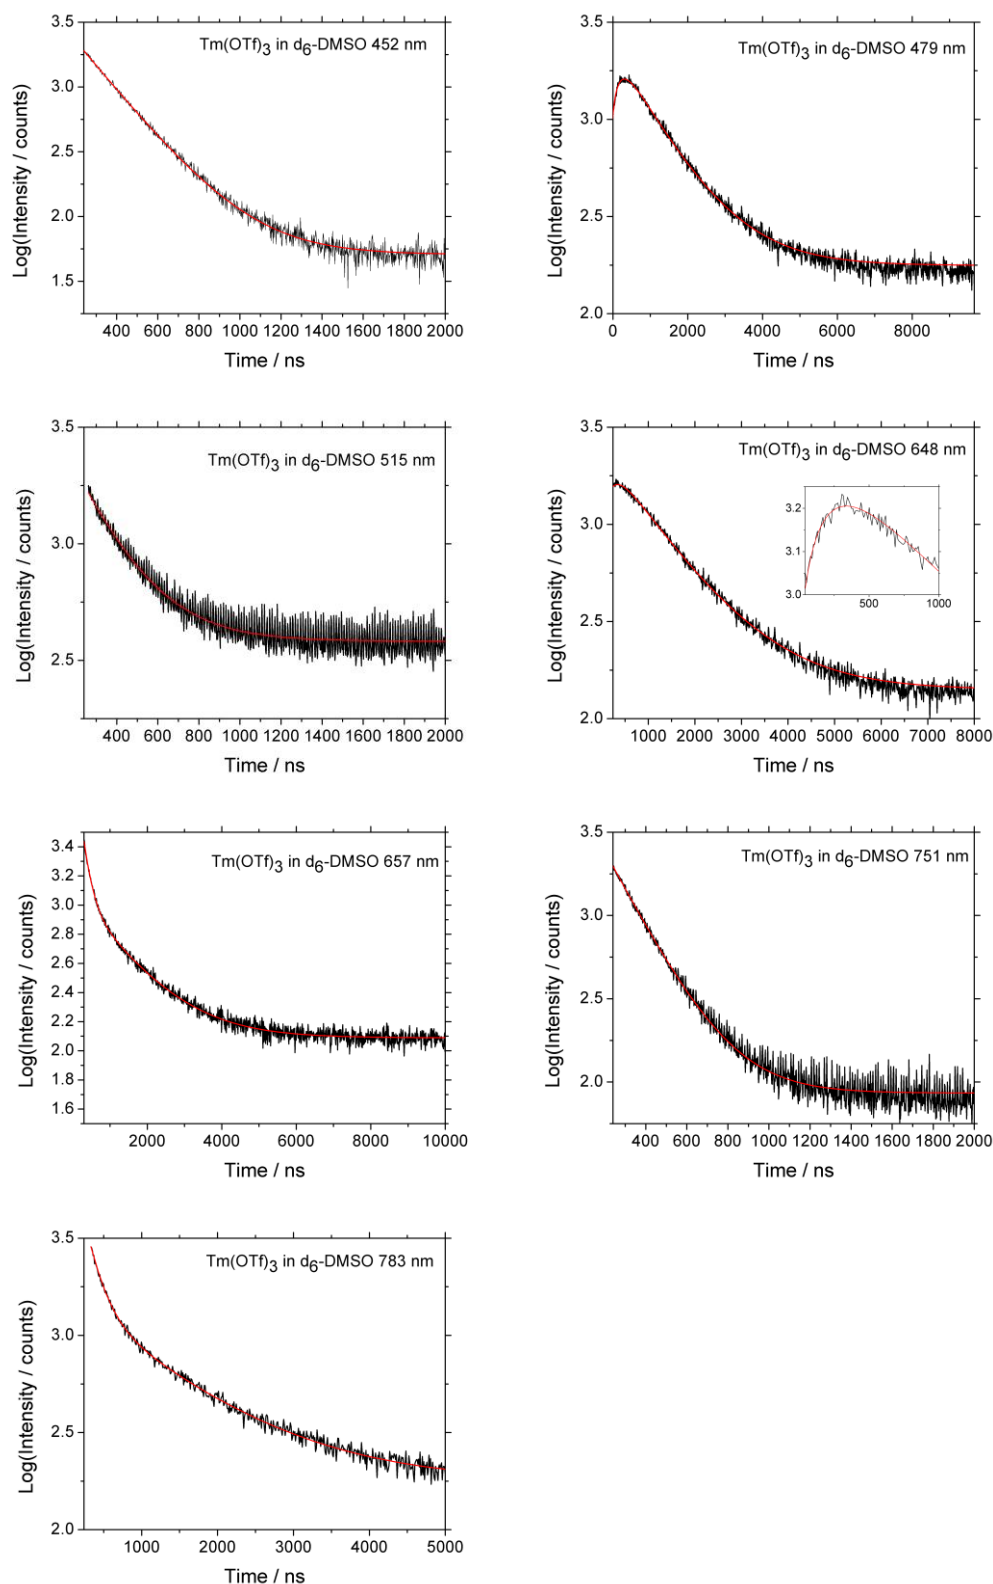

Figure S3: Black line: TCSPC traces of  $\text{Tm}(\text{OTf})_3$  in  $\text{d}_6$ -DMSO with 364 nm excitation. Red line: The fit of the data resulting from a tail fit for emission at 452, 515, 657, 751 and 783 nm, and a reconvolution fit for the rise and decay behaviour at 479 and 648 nm.

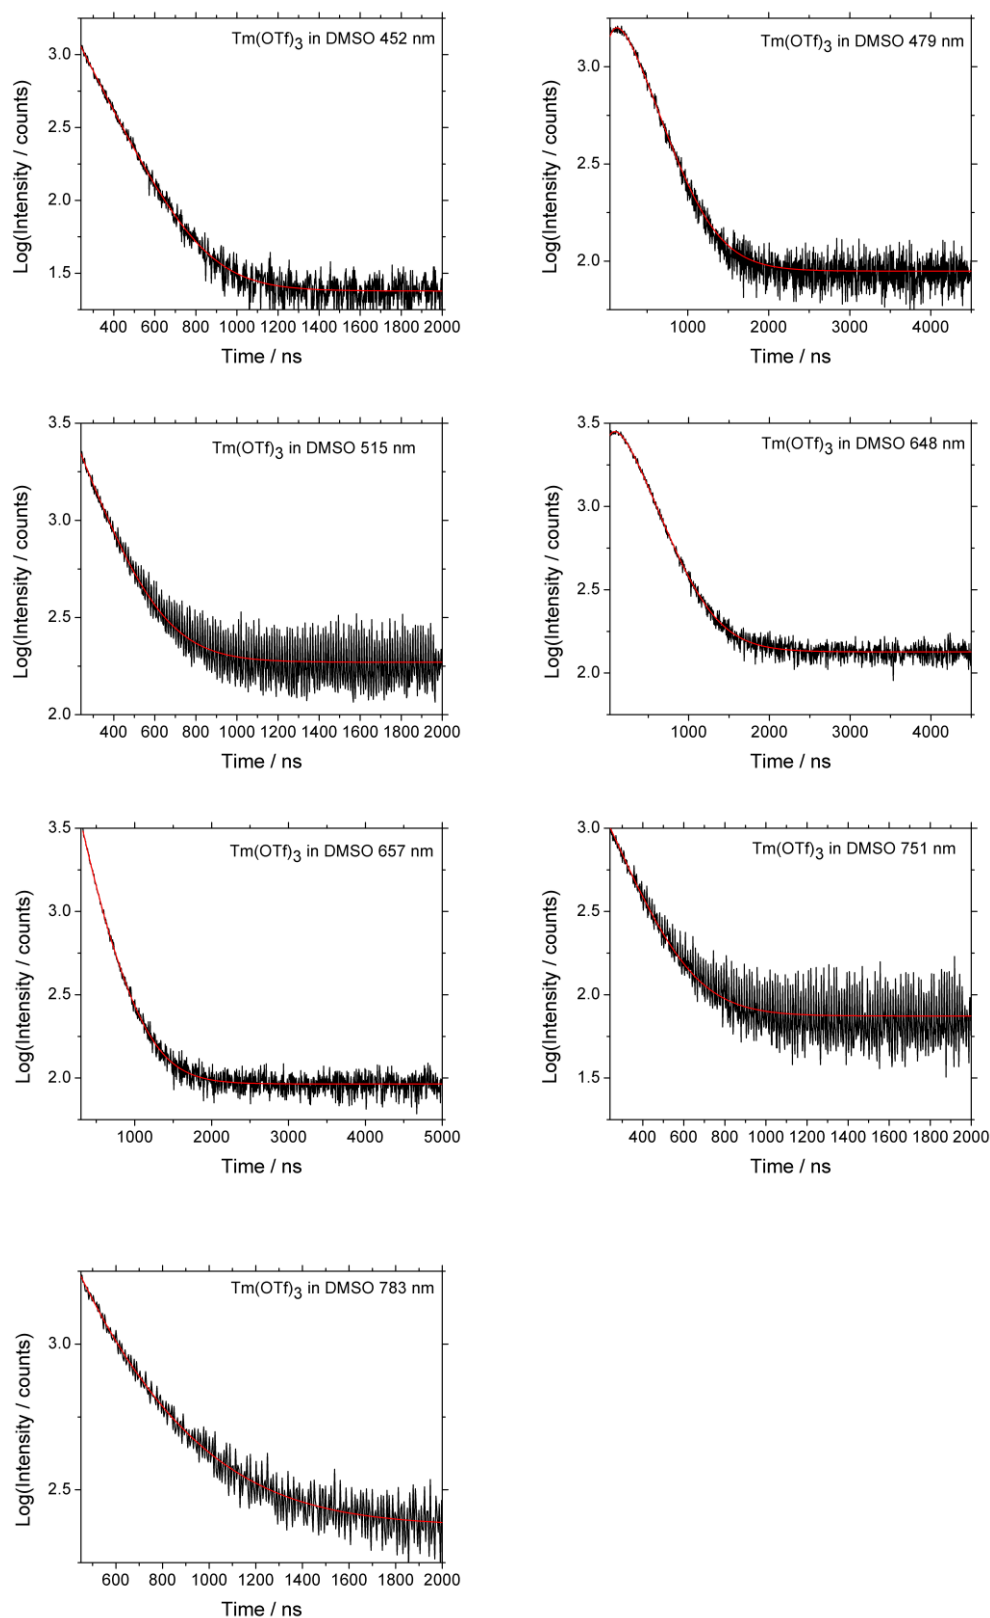

Figure S4: Black line: TCSPC traces of  $\text{Tm}(\text{OTf})_3$  in DMSO with 364 nm excitation. Red line: The fit of the data resulting from a tail fit for emission at 452, 515, 657, 751 and 783 nm, and a reconvolution fit for the rise and decay behaviour at 479 and 648 nm.

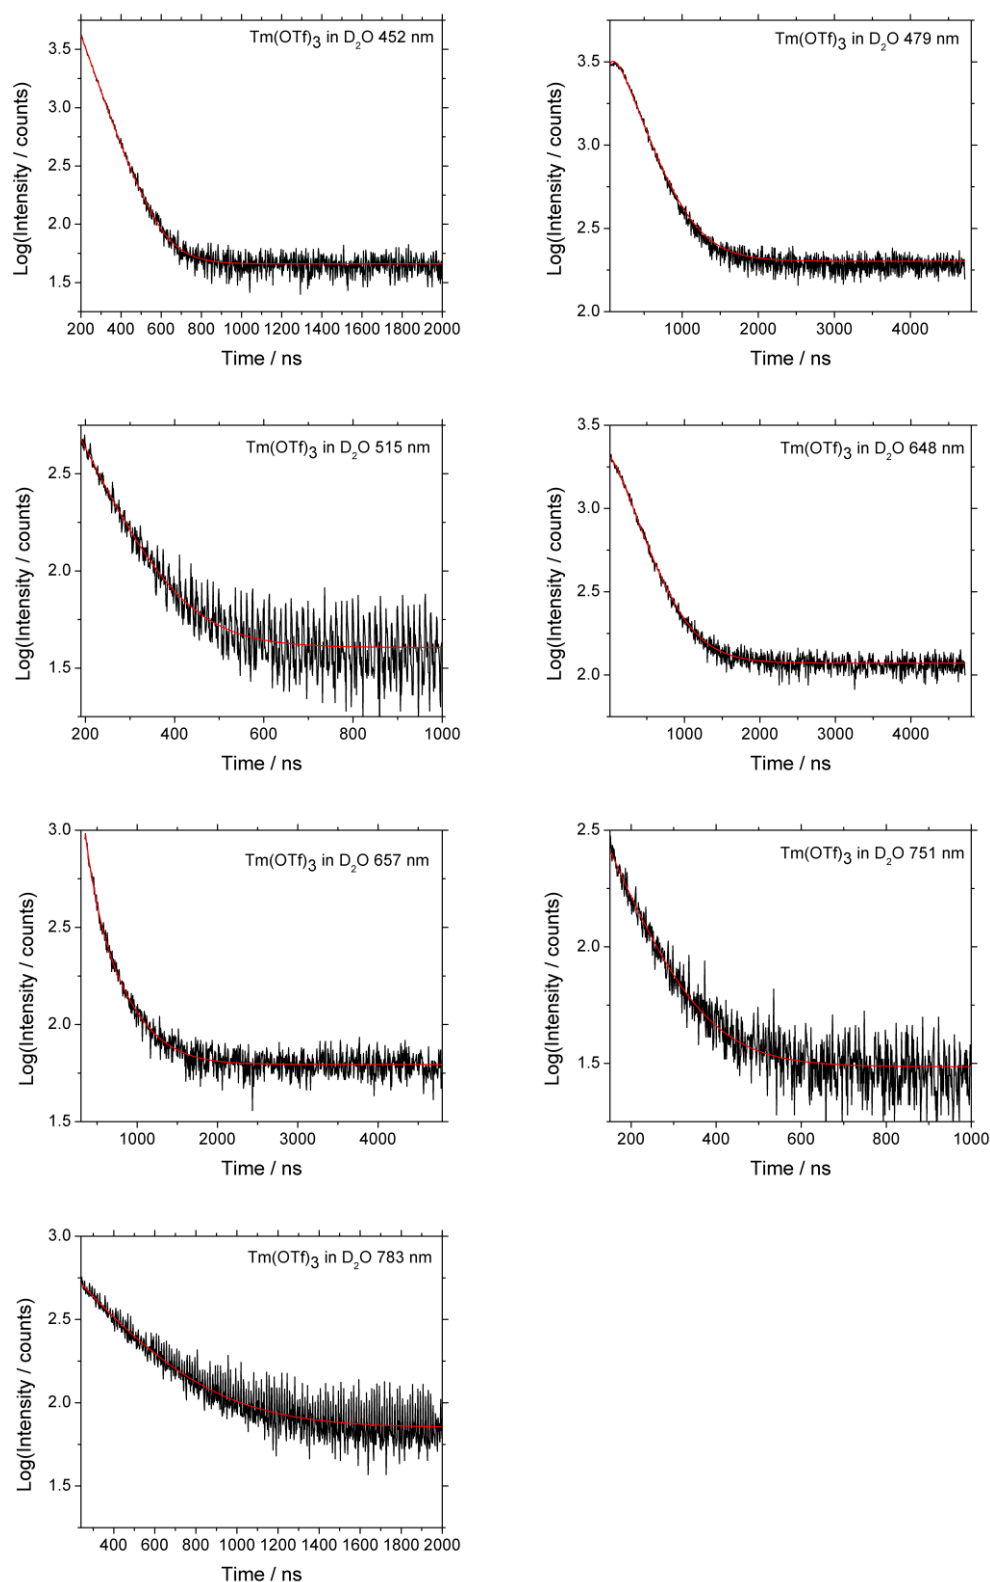

Figure S5: Black line: TCSPC traces of  $\text{Tm}(\text{OTf})_3$  in  $\text{D}_2\text{O}$  with 364 nm excitation. Red line: The fit of the data resulting from a tail fit for emission at 452, 515, 657, 751 and 783 nm, and a reconvolution fit for the rise and decay behaviour at 479 and 648 nm.

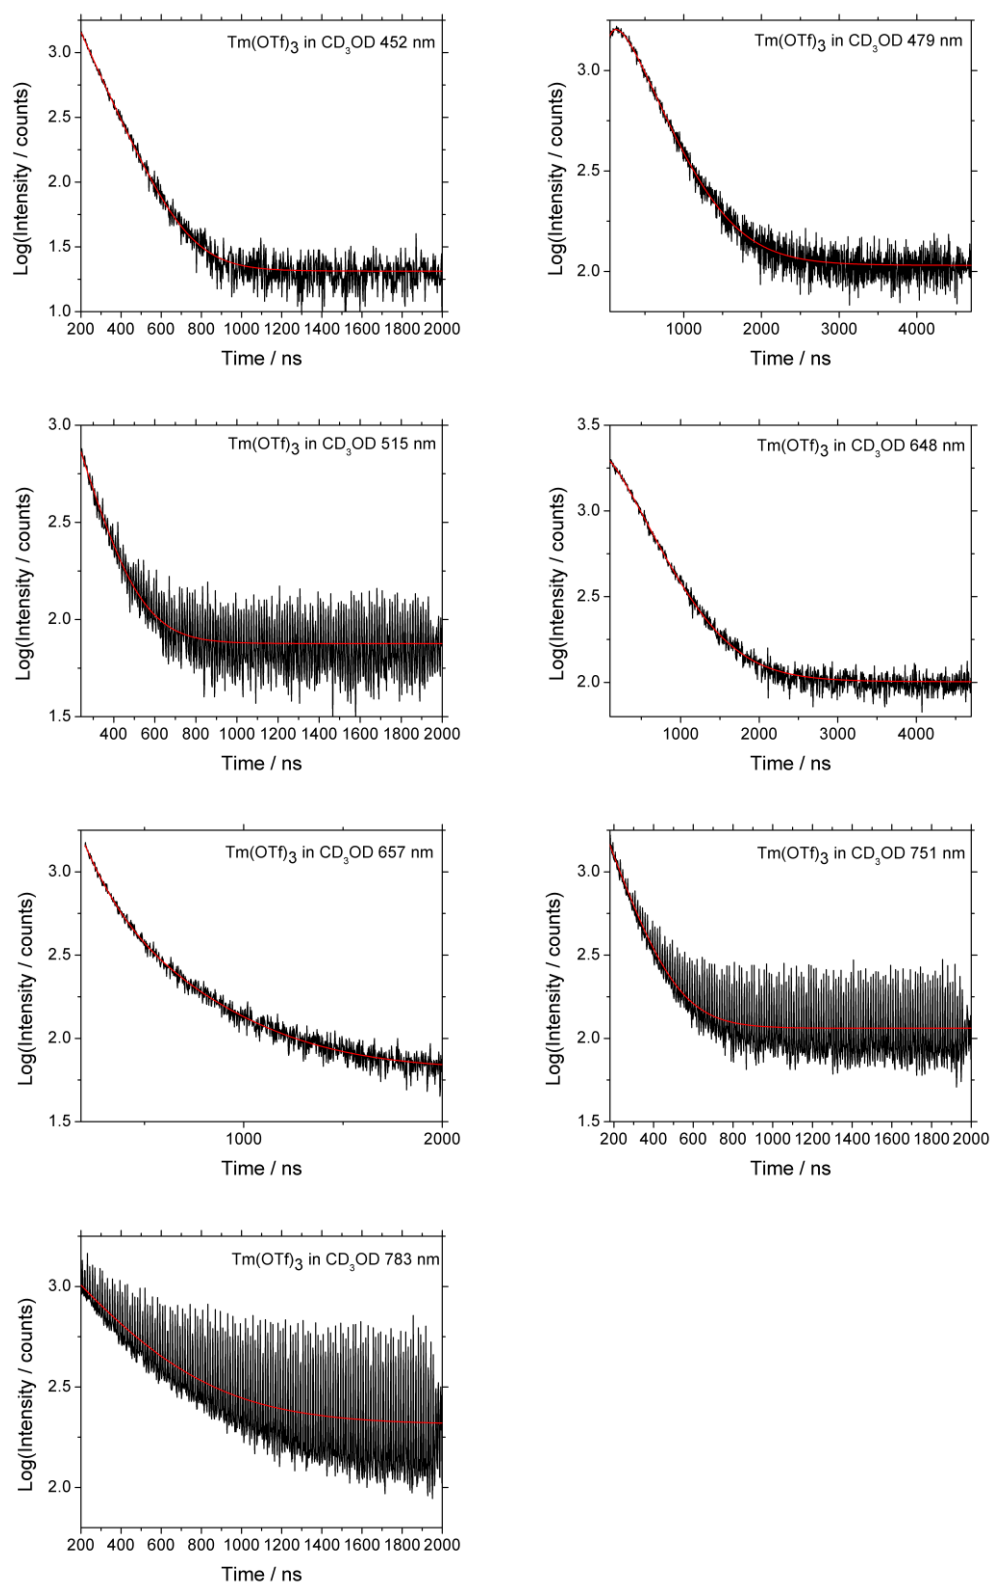

Figure S6: Black line: TCSPC traces of  $\text{Tm}(\text{OTf})_3$  in  $\text{CD}_3\text{OD}$  with 364 nm excitation. Red line: The fit of the data resulting from a tail fit for emission at 452, 515, 657, 751 and 783 nm, and a deconvolution fit for the rise and decay behaviour at 479 and 648 nm.



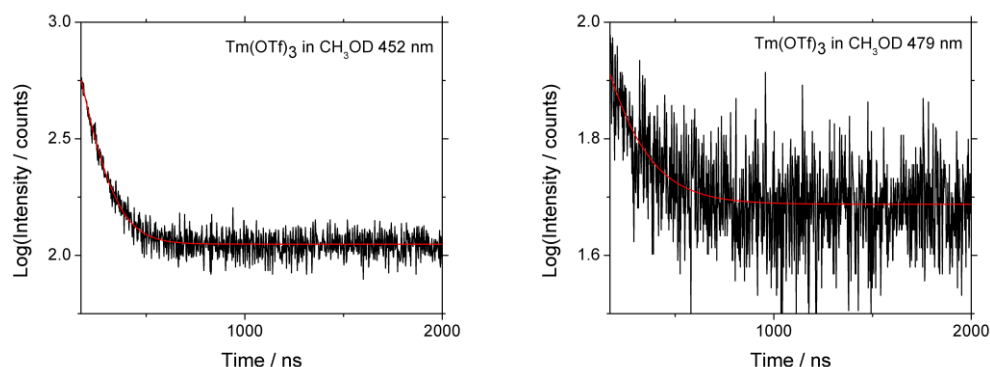

Figure S7: Black line: TCSPC traces of  $\text{Tm}(\text{OTf})_3$  in  $\text{CH}_3\text{OD}$  with 364 nm excitation. Red line: The fit of the data resulting from a tail fit for emission at 452 nm, and a reconvolution fit for the rise and decay behaviour at 479 nm.

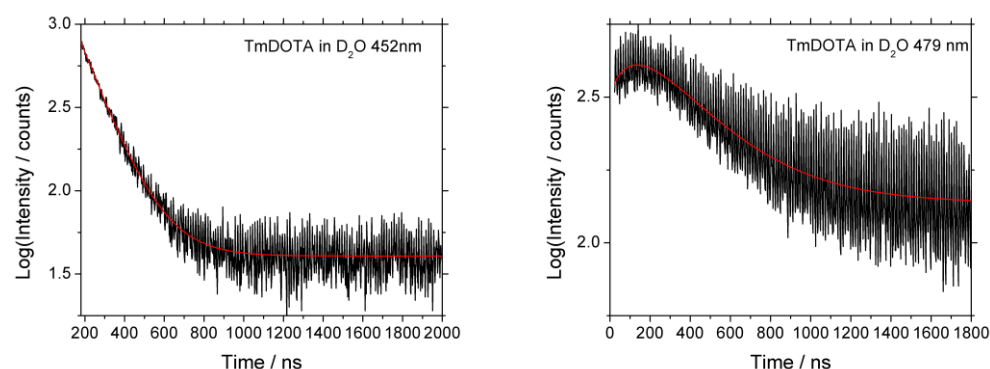

Figure S8: Black line: TCSPC traces of  $[\text{Tm.DOTA}]^-$  in  $\text{D}_2\text{O}$  with 364 nm excitation. Red line: The fit of the data resulting from a tail fit for emission at 452 nm, and a reconvolution fit for the rise and decay behaviour at 479 nm.

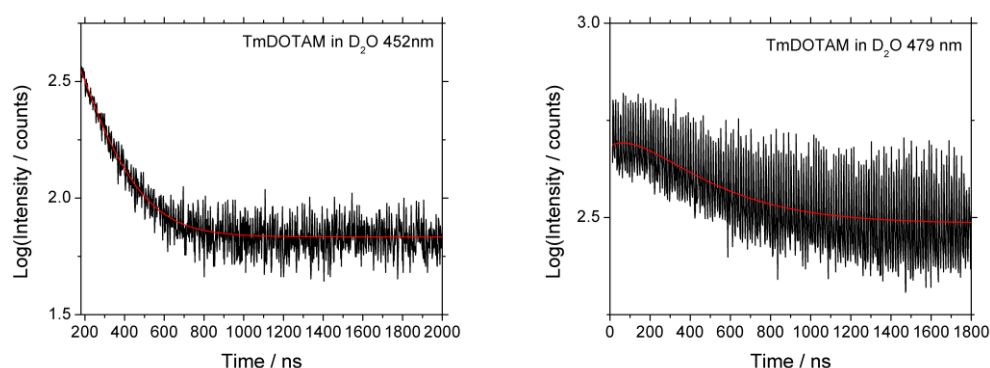

Figure S9: Black line: TCSPC traces of  $[\text{Tm.DOTAM}]^{3+}$  in  $\text{D}_2\text{O}$  with 364 nm excitation. Red line: The fit of the data resulting from a tail fit for emission at 452 nm, and a reconvolution fit for the rise and decay behaviour at 479 nm.

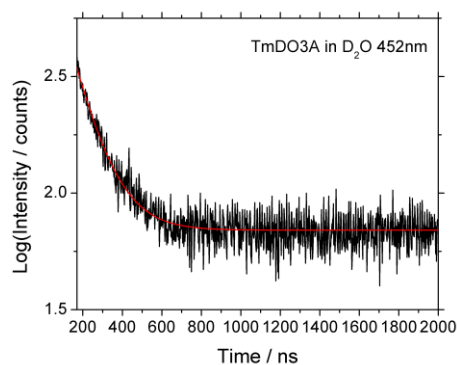

Figure S10: Black line: TCSPC trace of [Tm.D03A] in D<sub>2</sub>O with 364 nm excitation. Red line: The fit of the data resulting from a tail fit for emission at 452 nm.

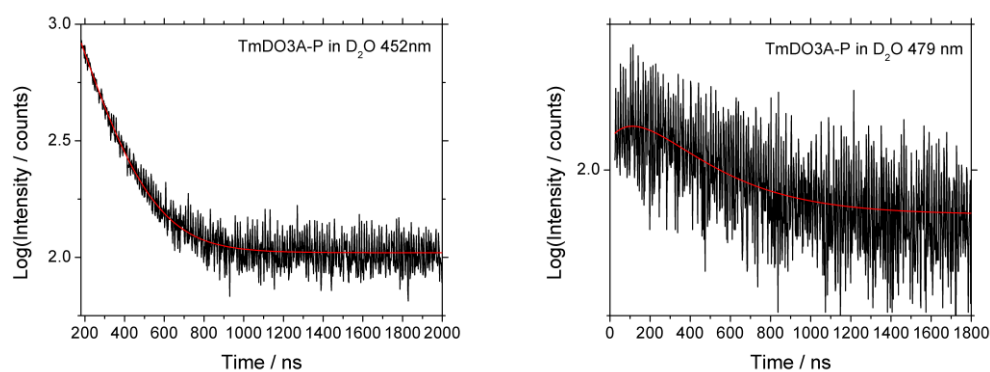

Figure S11: Black line: TCSPC traces of [TmD03A-P] in D<sub>2</sub>O with 364 nm excitation. Red line: The fit of the data resulting from a tail fit for emission at 452 nm, and a reconvolution fit for the rise and decay behaviour at 479 nm.

## 4. Emission Spectra

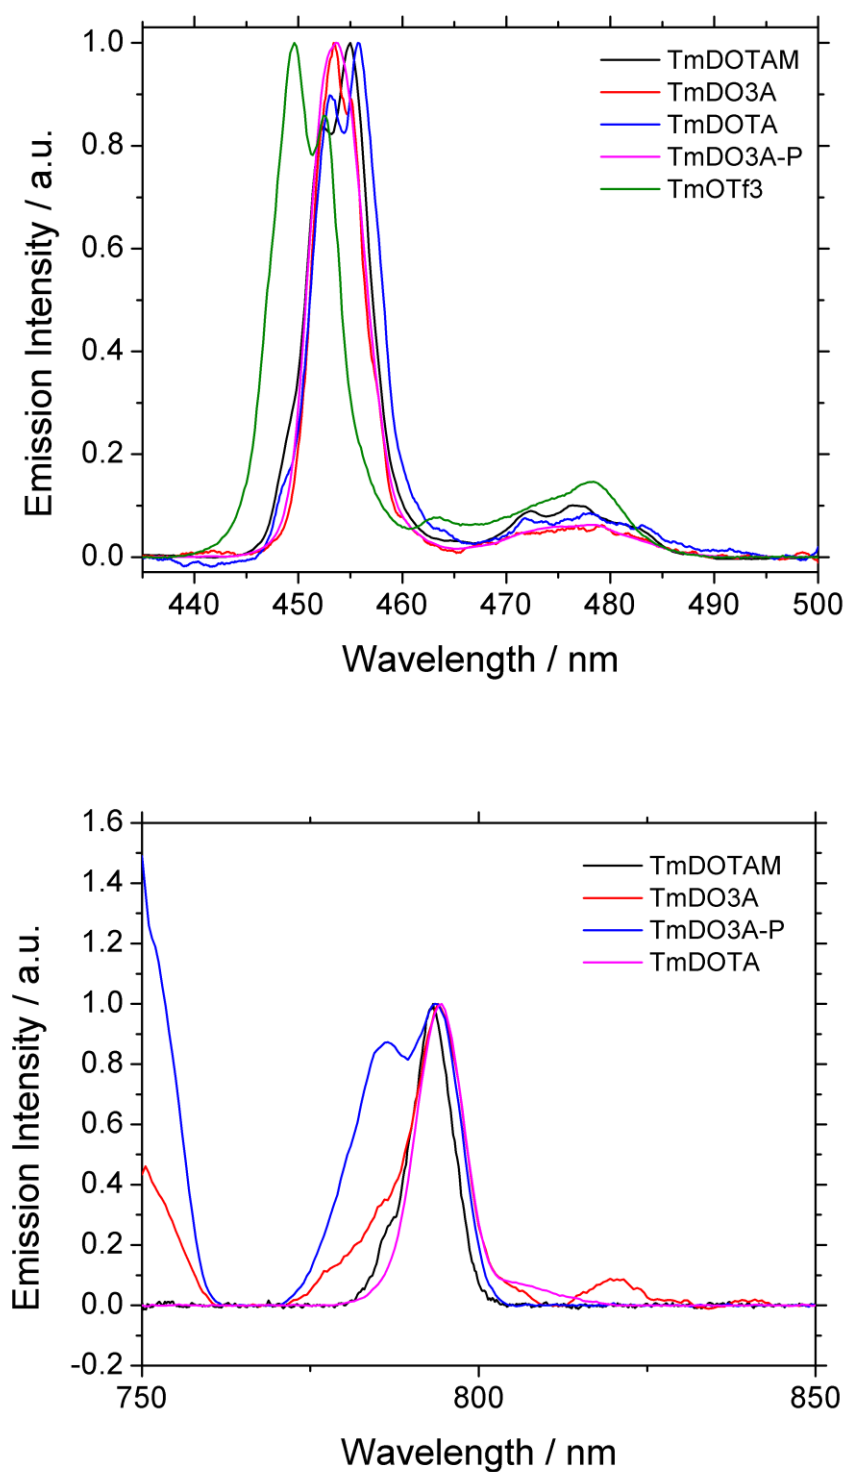

Figure S12: Overlaid emission spectra of Tm(OTf)<sub>3</sub>, TmDOTAM, TmDO3A, TmDO3A-P and TmDOTA in D<sub>2</sub>O upon excitation at 360 nm.

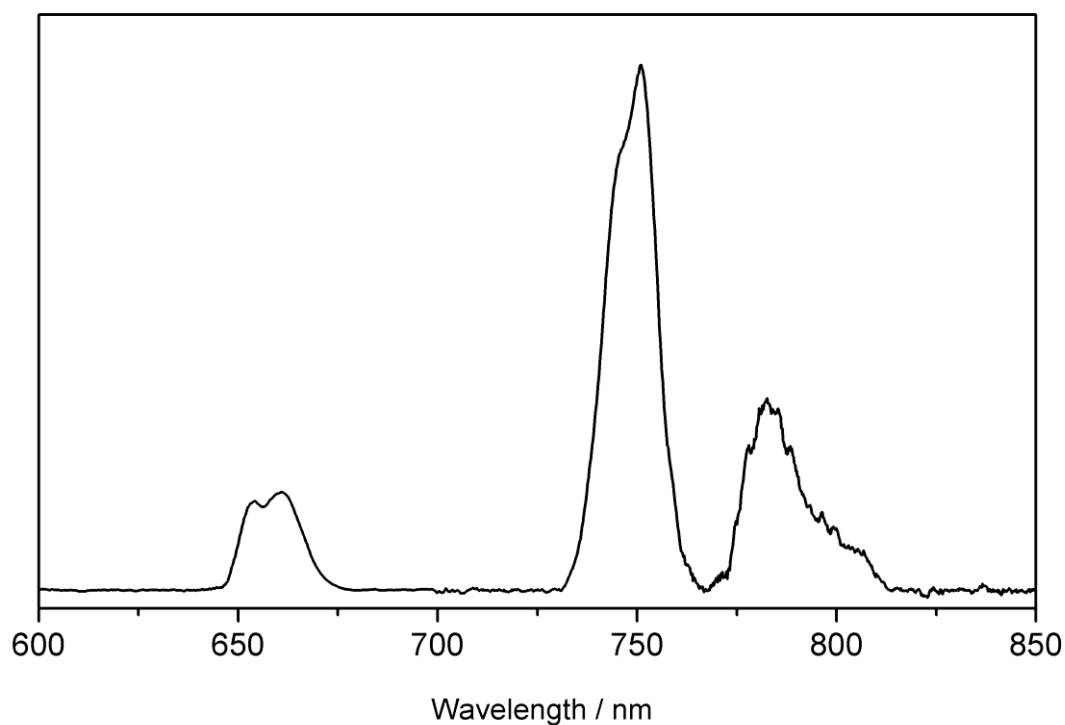

Figure S13: Emission from  $^1\text{D}_2$ , of  $\text{Tm}(\text{OTf})_3$  in  $d_6$ -DMSO, obtained by subtraction of the emission spectrum on 465 nm excitation from the spectrum on 360 nm excitation.

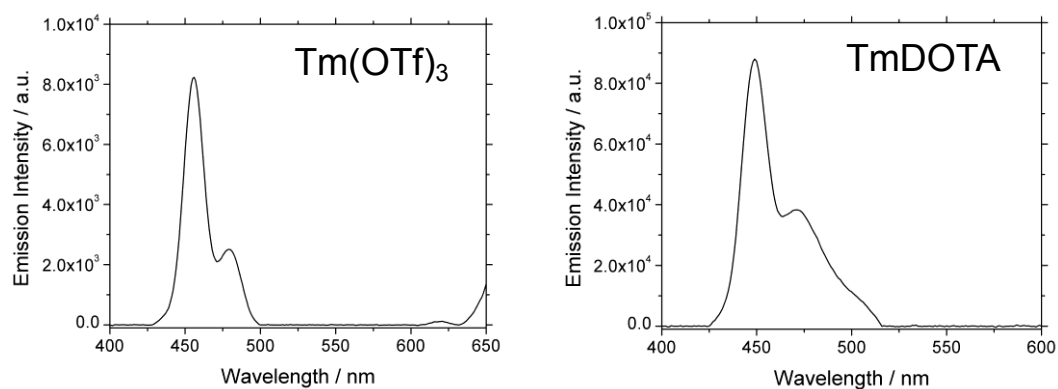

Figure S14. Two photon emission spectra, exciting into  $^1\text{D}_2$  at 728 nm, of  $\text{Tm}(\text{OTf})_3$  in  $d_6$ -DMSO and  $[\text{Tm}.\text{DOTA}]^-$  in  $\text{D}_2\text{O}$ .
